# Supplementary material for: Weak Association between Vastus Lateralis Muscle Fiber Composition and Fascicle Length in Young Untrained Females
Source: MDPI journal article supplement (doi:10.3390/sports9050056), 2021-04-28
Supplement: s1 [file s1]

**Table S1.** Correlations between lower extremities' lean body mass, Vastus Lateralis' architecture, fiber type composition and performance variables, for the total of participants, as well as for each group separately

|                           |         | Legs<br>Lean<br>Body<br>Mass | Vastus Lateralis Architecture |                    |                    | Vastus Lateralis Fiber Type Composition |         |          |                      |         |          |                                 |         |         |
|---------------------------|---------|------------------------------|-------------------------------|--------------------|--------------------|-----------------------------------------|---------|----------|----------------------|---------|----------|---------------------------------|---------|---------|
|                           |         |                              |                               |                    |                    | Percentage                              |         |          | Cross-Sectional Area |         |          | Percentage Cross-Sectional Area |         |         |
|                           |         |                              | Muscle<br>Thickness           | Pennation<br>Angle | Fascicle<br>Length | I                                       | IIa     | IIx      | I                    | IIa     | IIx      | I                               | IIa     | IIx     |
| All Participants (N = 60) |         |                              |                               |                    |                    |                                         |         |          |                      |         |          |                                 |         |         |
| RFD                       | CMJP    | 0.595 *                      | 0.411 *                       | 0.279 *            | 0.341 *            | -0.123                                  | 0.067   | 0.047    | -0.069               | 0.079   | 0.238    | 0.028                           | -0.010  | -0.031  |
|                           | MIF     | 0.389 *                      | 0.330 *                       | 0.198              | 0.355 *            | -0.056                                  | 0.071   | -0.025   | -0.403 *             | 0.410 * | 0.384 *  | -0.499 *                        | 0.434 * | 0.221   |
|                           | 20 ms   | 0.365 *                      | 0.133                         | 0.145              | 0.224              | 0.031                                   | -0.072  | 0.058    | 0.047                | 0.151   | 0.206    | 0.151                           | -0.094  | -0.097  |
|                           | 80 ms   | 0.433 *                      | 0.161                         | 0.204              | 0.248              | 0.001                                   | -0.076  | 0.097    | 0.069                | 0.203   | 0.183    | 0.150                           | -0.107  | -0.072  |
|                           | 100 ms  | 0.423 *                      | 0.189                         | 0.224              | 0.255              | 0.013                                   | -0.073  | 0.078    | 0.071                | 0.231   | 0.197    | 0.144                           | -0.093  | -0.086  |
|                           | 150 ms  | 0.456 *                      | 0.248                         | 0.282 *            | 0.245              | 0.045                                   | -0.052  | 0.014    | 0.080                | 0.248   | 0.246    | 0.112                           | -0.038  | -0.124  |
|                           | 200 ms  | 0.432 *                      | 0.274 *                       | 0.306 *            | 0.253              | 0.090                                   | -0.053  | -0.041   | 0.015                | 0.311   | 0.190    | 0.115                           | -0.009  | -0.177  |
|                           | 250 ms  | 0.447 *                      | 0.303 *                       | 0.316 *            | 0.372 *            | 0.092                                   | -0.027  | -0.076   | -0.045               | 0.322   | 0.168    | 0.091                           | 0.034   | -0.206  |
| 1RM                       | 0.426 * | 0.267 *                      | 0.300 *                       | -0.003             | 0.108              | 0.407 *                                 | 0.208   | -0.487 * | 0.511 *              | 0.509 * | -0.500 * | 0.512 *                         | 0.230   |         |
| High Power Group (N = 30) |         |                              |                               |                    |                    |                                         |         |          |                      |         |          |                                 |         |         |
| RFD                       | CMJP    | 0.645 *                      | 0.477 *                       | 0.320 *            | 0.400 *            | -0.117                                  | 0.497 * | 0.466 *  | -0.039               | 0.200   | 0.097    | -0.076                          | 0.500 * | 0.421 * |
|                           | MIF     | 0.500 *                      | 0.480 *                       | 0.298              | 0.499 *            | -0.039                                  | 0.150   | 0.089    | -0.575 *             | 0.574 * | 0.538 *  | -0.672 *                        | 0.624 * | 0.703 * |
|                           | 20 ms   | 0.111                        | 0.094                         | 0.100              | 0.148              | -0.103                                  | 0.169   | 0.072    | 0.279                | 0.242   | 0.236    | 0.156                           | 0.227   | 0.072   |
|                           | 80 ms   | 0.230                        | 0.114                         | 0.145              | 0.076              | -0.104                                  | 0.117   | 0.006    | 0.245                | 0.284   | 0.181    | 0.171                           | 0.271   | 0.024   |
|                           | 100 ms  | 0.235                        | 0.174                         | 0.200              | 0.086              | -0.103                                  | 0.134   | 0.016    | 0.252                | 0.330   | 0.214    | 0.174                           | 0.262   | 0.045   |
|                           | 150 ms  | 0.514 *                      | 0.319                         | 0.347 *            | 0.324 *            | -0.016                                  | 0.139   | 0.139    | 0.238                | 0.305   | 0.325    | 0.116                           | 0.232   | 0.148   |
|                           | 200 ms  | 0.537 *                      | 0.333 *                       | 0.324 *            | 0.375 *            | -0.017                                  | 0.182   | 0.090    | 0.274                | 0.365   | 0.284    | 0.132                           | 0.276   | 0.123   |
|                           | 250 ms  | 0.567 *                      | 0.378 *                       | 0.360 *            | 0.400 *            | -0.025                                  | 0.164   | 0.102    | 0.359                | 0.388   | 0.296    | 0.084                           | 0.346   | 0.146   |
| 1RM                       | 0.612 * | 0.389 *                      | 0.500 *                       | 0.245              | -0.245             | 0.577 *                                 | 0.451 * | -0.598 * | 0.630 *              | 0.599 * | -0.601 * | 0.621 *                         | 0.579 * |         |
| Low Power Group (N = 30)  |         |                              |                               |                    |                    |                                         |         |          |                      |         |          |                                 |         |         |
| RFD                       | CMJP    | 0.444 *                      | 0.366 *                       | 0.133              | 0.031              | 0.248                                   | -0.125  | -0.141   | -0.144               | -0.117  | 0.295    | 0.269                           | -0.065  | -0.280  |
|                           | MIF     | 0.312 *                      | 0.290 *                       | 0.087              | 0.215              | 0.030                                   | 0.048   | -0.117   | -0.132               | 0.191   | 0.003    | 0.059                           | 0.117   | -0.266  |
|                           | 20 ms   | 0.401                        | -0.068                        | 0.057              | 0.134              | -0.001                                  | 0.170   | -0.255   | -0.155               | 0.112   | 0.085    | 0.112                           | 0.137   | -0.349  |
|                           | 80 ms   | 0.393                        | -0.011                        | 0.139              | 0.122              | 0.020                                   | 0.149   | -0.266   | -0.139               | 0.192   | 0.090    | 0.095                           | 0.144   | -0.342  |

|        |         |        |       |        |       |        |        |        |        |        |       |        |        |
|--------|---------|--------|-------|--------|-------|--------|--------|--------|--------|--------|-------|--------|--------|
| 100 ms | 0.398   | -0.009 | 0.144 | 0.124  | 0.028 | 0.145  | -0.273 | -0.138 | 0.212  | 0.095  | 0.077 | 0.161  | -0.307 |
| 150 ms | 0.224   | -0.038 | 0.142 | 0.102  | 0.091 | 0.100  | -0.219 | -0.139 | 0.238  | 0.098  | 0.064 | 0.140  | -0.330 |
| 200 ms | 0.323   | 0.003  | 0.204 | 0.129  | 0.099 | 0.090  | -0.227 | -0.203 | 0.240  | 0.036  | 0.060 | 0.159  | -0.339 |
| 250 ms | 0.399 * | 0.030  | 0.220 | 0.159  | 0.122 | 0.089  | -0.224 | 0.244  | 0.234  | -0.013 | 0.064 | 0.164  | -0.343 |
| 1RM    | 0.326 * | 0.121  | 0.208 | -0.249 | 0.212 | -0.269 | 0.116  | -0.293 | -0.361 | 0.082  | 0.049 | -0.085 | 0.056  |

With (\*) denoted the significant correlations ( $p < 0.05$ ).
